# Supplementary material for: Surgical safety checklist audits may be misleading! Improving the implementation and adherence of the surgical safety checklist: a quality improvement project
Source: PubMed Central journal article supplement — BMJ Open Qual. 2021 Nov 3;10(4):e001593. doi: 10.1136/bmjoq-2021-001593 (PMC8572456; doi:10.1136/bmjoq-2021-001593), 2021-11-03
Supplement: bmjoq-2021-001593supp001.pdf [file bmjoq-2021-001593supp001.pdf]

## STAFF SURVEY NUMBER 1 (June 2019)

1. Please identify your staff group:
  - a. Anaesthesia nurse
  - b. Surgical nurse
  - c. Anaesthesia doctor
  - d. Surgical doctor
  - e. Theatre orderly
  - f. Other
2. I find the layout of the new Surgical Safety Checklist to have:
  - a. Improved
  - b. Not improved
  - c. Not changed
  - d. COMMENT
3. Compared to the previous form, my understanding of the questions on the new SSC has
  - a. Improved
  - b. Not improved
  - c. Not changed
  - d. COMMENT
4. My ability to know my team members names has
  - a. Improved
  - b. Not improved
  - c. Not changed
  - d. COMMENT
5. The integration of the SSC within my workflow has
  - a. Improved
  - b. Not improved
  - c. Not changed
  - d. COMMENT
6. I feel that by using the new SSC, patient safety has:
  - a. Improved
  - b. Not improved
  - c. Not changed
  - d. COMMENT
7. We have received feedback that the pre-induction section of the SSC should also include the presence of a surgical doctor and a surgical nurse. Do you:
  - a. Agree
  - b. Disagree
  - c. Indifferent
  - d. Comment
8. What have you **disliked** about the new SSC?
9. What have you **liked** about the new SSC?
10. Do you have any suggestions for improvements to the new SSC?

## STAFF SURVEY 2 (September 2019)

1. Please identify your staff group:
  - g. Anaesthesia nurse
  - h. Surgical nurse
  - i. Anaesthesia doctor
  - j. Surgical doctor
  - k. Theatre orderly
  - l. Other
2. I find the layout of the new SSC to have:
  - a. Improved
  - b. Not improved
  - c. Not changed
  - d. COMMENT
3. Compared to the previous form, my understanding of the questions on the new SSC has
  - a. Improved
  - b. Not improved
  - c. Not changed
  - d. COMMENT
4. The integration of the SSC within my workflow has
  - a. Improved
  - b. Not improved
  - c. Not changed
  - d. COMMENT
5. I feel that by using the new SSC, patient safety has:
  - e. Improved
  - f. Not improved
  - g. Not changed
  - h. COMMENT
6. What have you **disliked** about the new SSC?
7. What have you **liked** about the new SSC?
8. Do you have any suggestions for improvements to the new SSC?
9. Currently we are achieving a 65% compliance with the new SSC. This is significantly improved from the old checklist (3.5%) however still not meeting our target compliance of 90%. Why do you think this is?
10. What ideas do you have for improving our compliance to reach our 90% target?
